# Supplementary material
Source: HighWire-hosted journal article supplement (https://tsaco.smart01.highwire.org/content/9/1/e001290)
Supplement: inline-supplementary-material-1 [file inline-supplementary-material-1.pdf]

## Supplemental Material

Analysis of demographics and clinical outcomes of patients who either received CB or BL resuscitation. Patients who did not receive resuscitation (i.e., NR cohort patients) were dropped from the analysis. These supplementary tables were created in response to reviewer comments.

**Table A. Demographic and injury mechanism data of crystalloid based or blood product treatment hemorrhagic shock patients (n=317).**

|                         | Crystalloid-based (n=278) | Blood product (n=39) | p-value |
|-------------------------|---------------------------|----------------------|---------|
|                         | Percentage (n)            | Percentage (n)       |         |
| Age (median, IQR)       | 28 (23-38)                | 35 (25-42)           | 0.08    |
| Male sex                | 81.3 (226)                | 82.1 (32)            | 1.00    |
| Urban residence         | 86.3 (240)                | 79.5 (31)            | 0.20    |
| Missing                 | 1.8 (5)                   | 5.1 (2)              |         |
| Own cellphone           | 85.6 (238)                | 87.2 (34)            | 0.28    |
| Missing                 | 1.1 (3)                   | 2.6 (1)              |         |
| Own agricultural land   | 8.3 (23)                  | 7.7 (3)              | 0.50    |
| Missing                 | 4.7 (13)                  | 7.7 (3)              |         |
| Mechanism               |                           |                      | 0.98    |
| RTI                     | 61.5 (171)                | 66.7 (26)            |         |
| Stab wound              | 21.2 (59)                 | 23.1 (9)             |         |
| Struck by person/object | 5.4 (15)                  | 2.5 (1)              |         |
| Fall                    | 4.3 (12)                  | 2.5 (1)              |         |
| Other/Missing           | 7.6 (21)                  | 5.1 (2)              |         |

Legend: IQR = interquartile range, RTI = road traffic injury, ICU = intensive care unit, OR = operating room, AMA = against medical advice

\* = p-value less than 0.05

\*\* = p-value less than 0.01

**Table B. Physiologic and clinical data of hemorrhagic shock patients (n=317) categorized by crystalloid-based and blood product resuscitation type.**

|                          | Crystalloid-based (n=278) | Blood product (n=39) | p-value  |
|--------------------------|---------------------------|----------------------|----------|
|                          | Median (IQR)              | Median (IQR)         |          |
| Polytrauma (% , n)       | 44.6 (124)                | 51.3 (20)            | 0.49     |
| GCS                      | 15 (14-15)                | 15 (8-15)            | 0.03     |
| Missing (% , n)          | 0.7 (2)                   | 0                    |          |
| HEAIS                    | 3 (3-4)                   | 4 (3-5)              | <0.001** |
| Missing (% , n)          | 2.2 (6)                   | 0                    |          |
| Arrival HR (bpm)         | 94 (75-107)               | 96 (81-113)          | 0.55     |
| Missing (% , n)          | 2.5 (7)                   | 5.1 (2)              |          |
| Arrival SBP (mmHg)       | 90 (80-96)                | 88 (72-96)           | 0.21     |
| Hgb (g/dL)               | 11.4 (10.4-13.1)          | 8.0 (6.8-9.1)        | <0.001** |
| Missing (% , n)          | 76.6 (213)                | 28.2 (11)            |          |
| Change in HR (bpm)       | -4 (-15 to +5)            | -5 (-28 to +16)      | 0.97     |
| Missing (% , n)          | 52.9 (147)                | 23.1 (9)             |          |
| Change in SBP (mmHg)     | +12 (+2 to +28)           | +9 (-2 to +21)       | 0.14     |
| Missing (% , n)          | 52.5 (146)                | 20.5 (8)             |          |
| Time to treatment (mins) | 12 (7-22)                 | 131 (70-240)         | <0.001** |
| Missing (% , n)          | 4.0 (11)                  | 23.1 (9)             |          |
| Disposition (% , n)      |                           |                      | 0.02*    |
| Discharged home          | 26.3 (73)                 | 20.5 (8)             |          |
| Admitted ward            | 18.3 (51)                 | 12.8 (5)             |          |
| Admitted ICU             | 2.2 (6)                   | 5.1 (2)              |          |
| Direct to OR             | 7.2 (20)                  | 20.5 (8)             |          |
| Died                     | 14.0 (39)                 | 28.2 (11)            |          |
| Left AMA                 | 23.7 (66)                 | 10.3 (4)             |          |
| Transferred              | 7.2 (20)                  | 2.6 (1)              |          |
| Other/Missing            | 1.1 (3)                   | 0                    |          |

Legend: IQR = interquartile range, HEAIS = Highest estimated abbreviated injury scale, HR = heart rate, SBP = systolic blood pressure, Hgb = hemoglobin, bpm = beats per minute, mmHg = millimeters of mercury, mins = minutes, g/dL = grams per deciliter, % = percentage, n = number of patients

\* = p-value less than 0.05

\*\* = p-value less than 0.01

**Table C. Multivariable logistic regression for mortality.**

|                    | Adjusted Odds Ratio | 95% CI     | p-value  |
|--------------------|---------------------|------------|----------|
| Age                | 1.02                | 0.99-1.04  | 0.16     |
| Male sex           | 0.83                | 0.31-2.17  | 0.70     |
| HEAIS              | 7.97                | 4.40-14.43 | <0.001** |
| Resuscitation type | 0.83                | 0.29-2.35  | 0.72     |

Legend: 95% CI = 95% confidence interval, HEAIS = Highest estimated abbreviated injury scale

\*\* = p-value less than 0.01
